# Supplementary material for: Site-specific immobilization of gold binding polypeptide on gold nanoparticle-coated graphene sheet for biosensor application
Source: Royal Society of Chemistry journal article supplement (doi:10.1039/c1nr10197h), 2011-01-01
Supplement: c1nr10197h.pdf [file c1nr10197h.pdf]

## Electronic supplementary information (ESI)

# **Site-specific immobilization of gold binding polypeptide on gold nanoparticle-coated graphene sheet for biosensor application**

**MinHo Yang,<sup>a</sup> Bong Gill Choi,<sup>a</sup> Tae Jung Park,<sup>\*b</sup> Nam Su Heo,<sup>b</sup> Won Hi Hong<sup>a</sup> and Sang Yup Lee<sup>\*a,b</sup>**

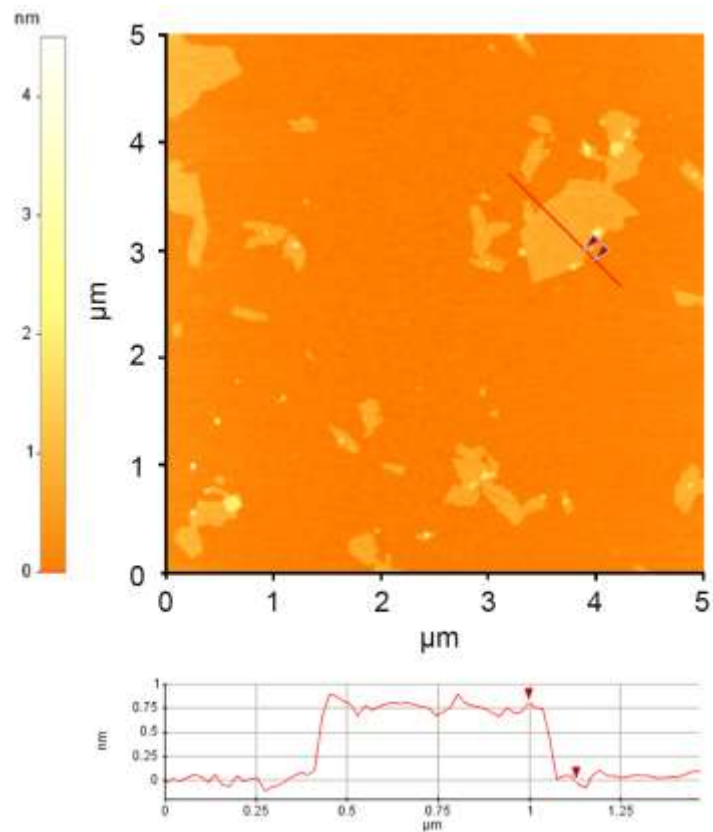

**Fig. S1** AFM image of GO-monolayered sheet.

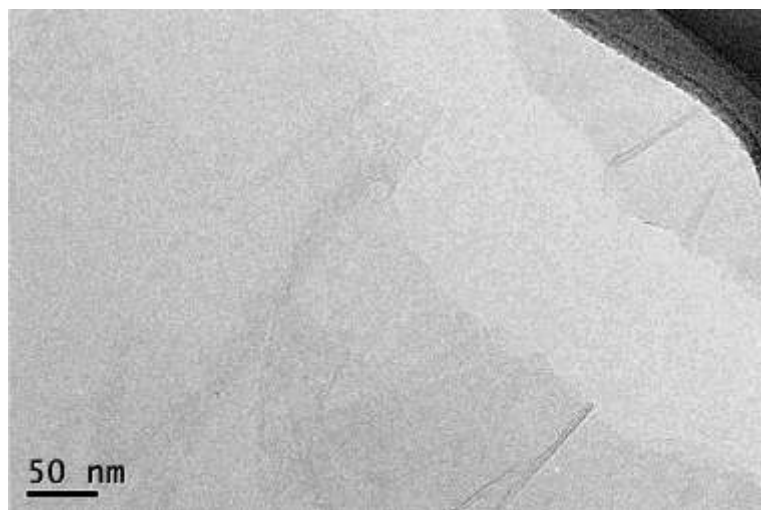

**Fig. S2** TEM image of GO single sheet.

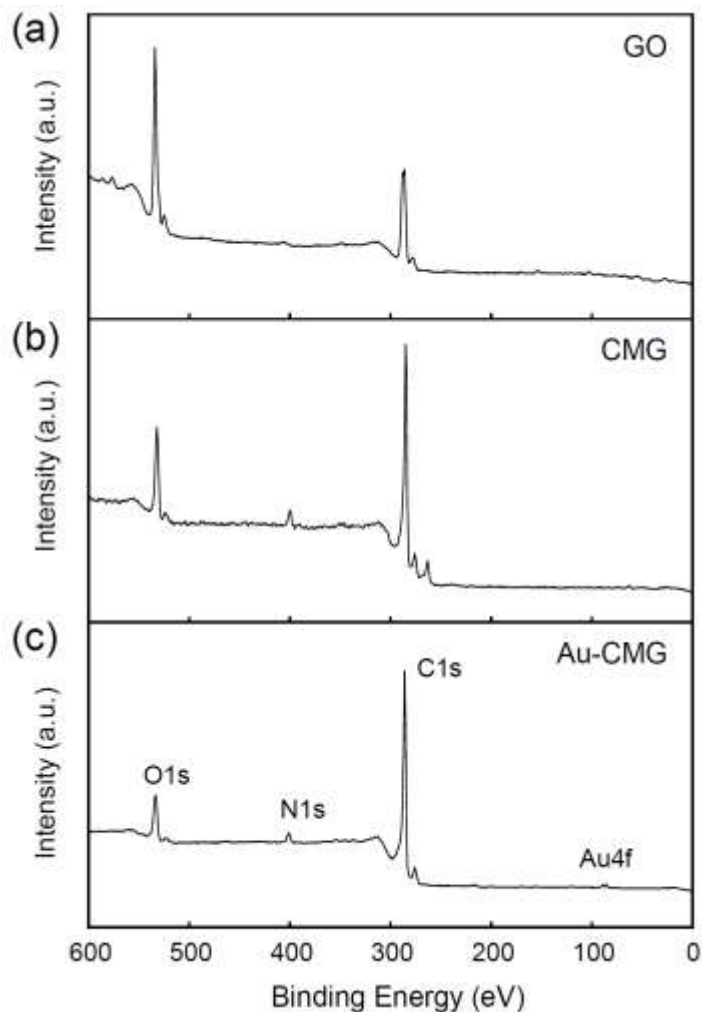

**Fig. S3** XPS data of (a) GO, (b) CMG and (c) Au-CMG hybrids.

The survey scan XPS spectra showed the surface chemical states of GO, CMG, and Au-CMG hybrids; in comparison with the C1s spectrum of GO, those of CMG and Au-CMG clearly exhibited decreased peak intensities corresponding to epoxy/ether group (286.6 eV),<sup>1</sup> which indicates successful removal of oxygen groups on GO sheets after hydrazine treatment.

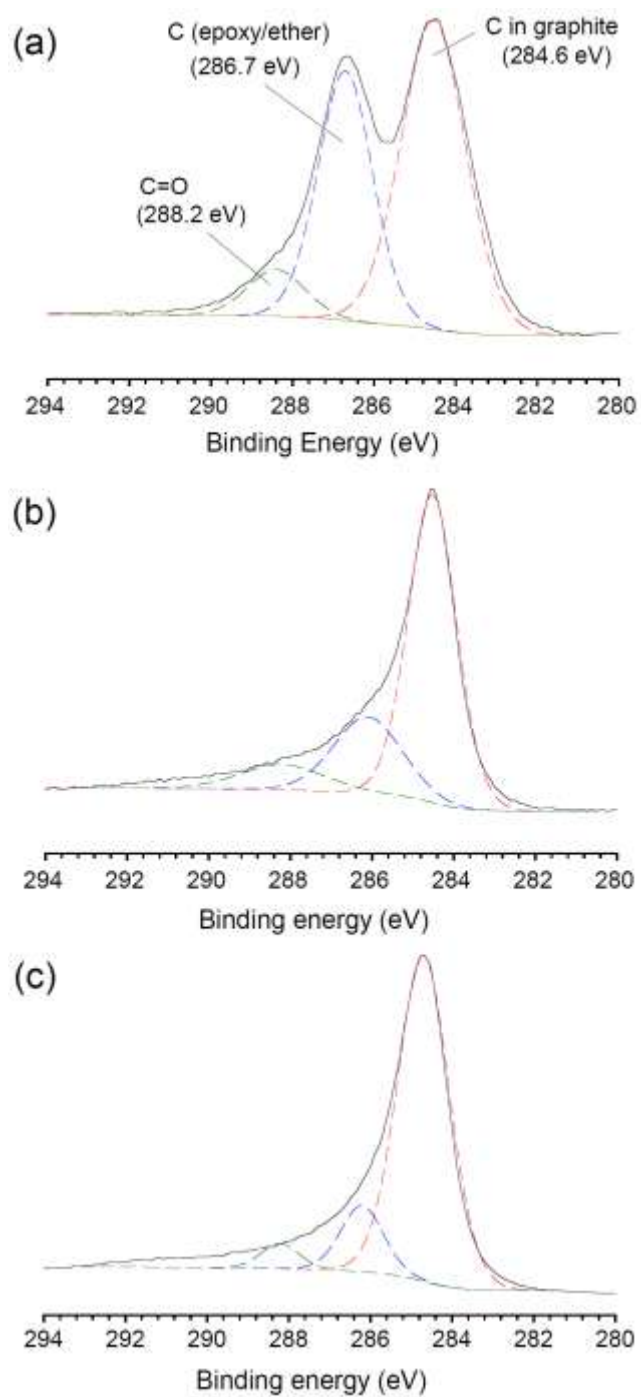

**Fig. S4** C1s XPS spectra of (a) GO, (b) CMG and (c) Au-CMG hybrids.

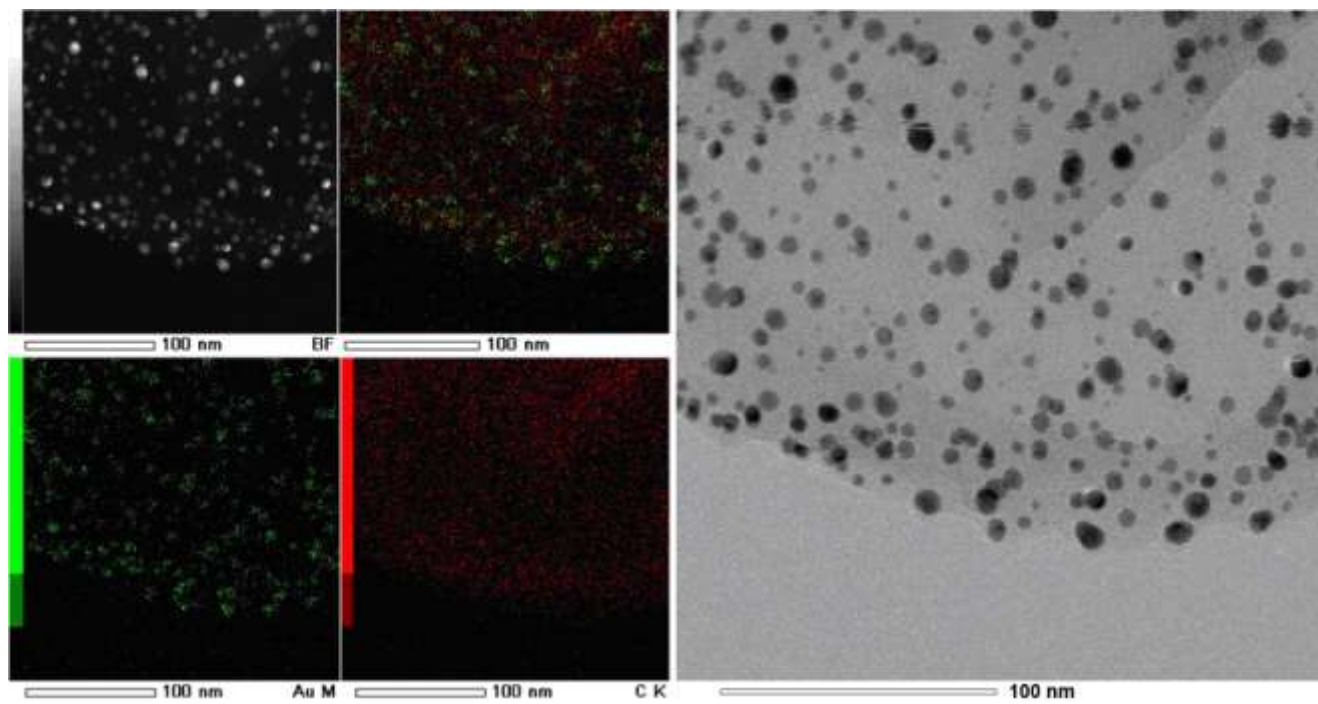

**Fig. S5** EDS mapping images from STEM and TEM images of Au-CMG hybrids.

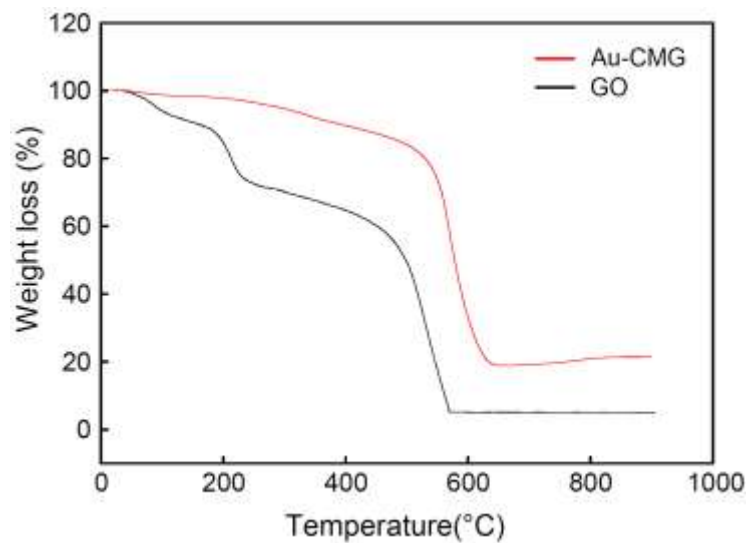

**Fig. S6** TGA curves of GO (black line) and Au-CMG (red line) hybrids.

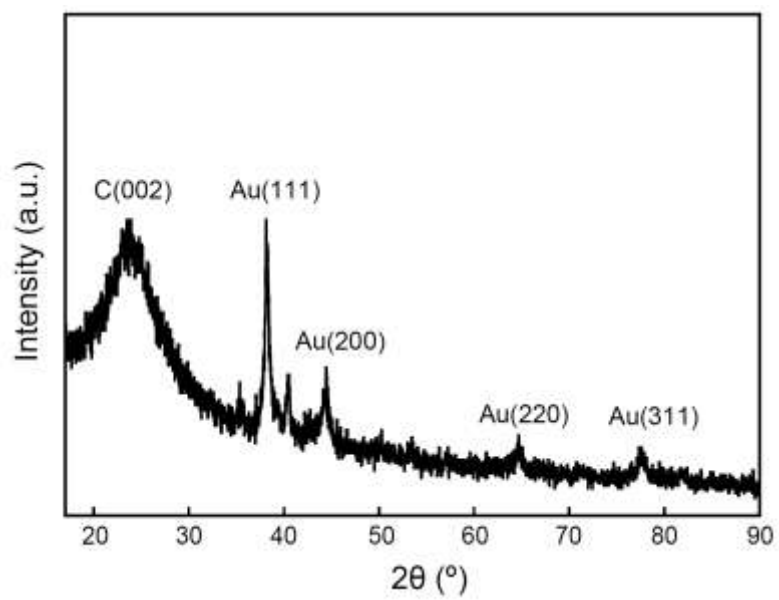

**Fig. S7** XRD pattern of Au-CMG hybrids.



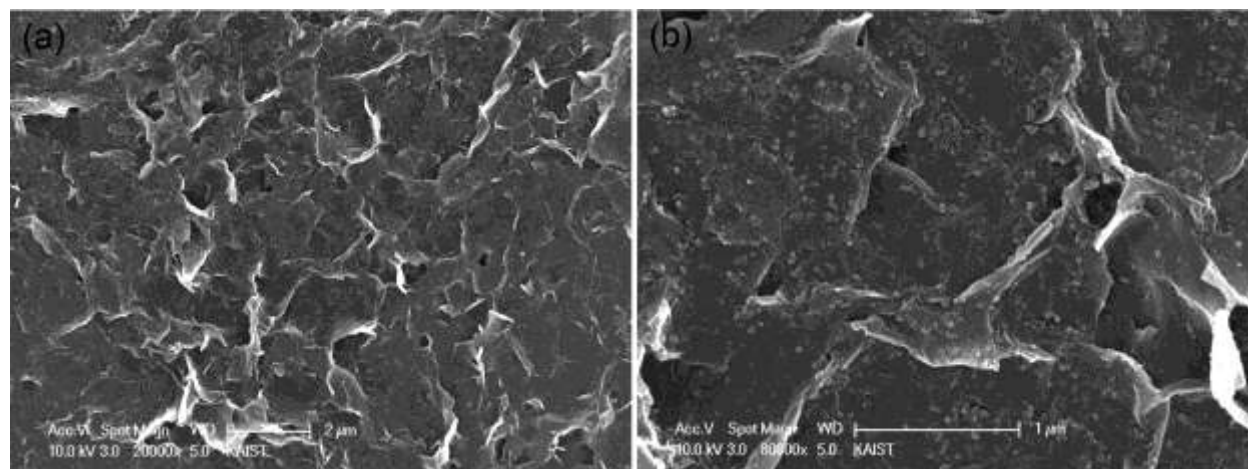

**Fig. S8** SEM images of the electrode surface deposited with GBP-OPH/Au-CMG at (a) low magnification and (b) high magnification.

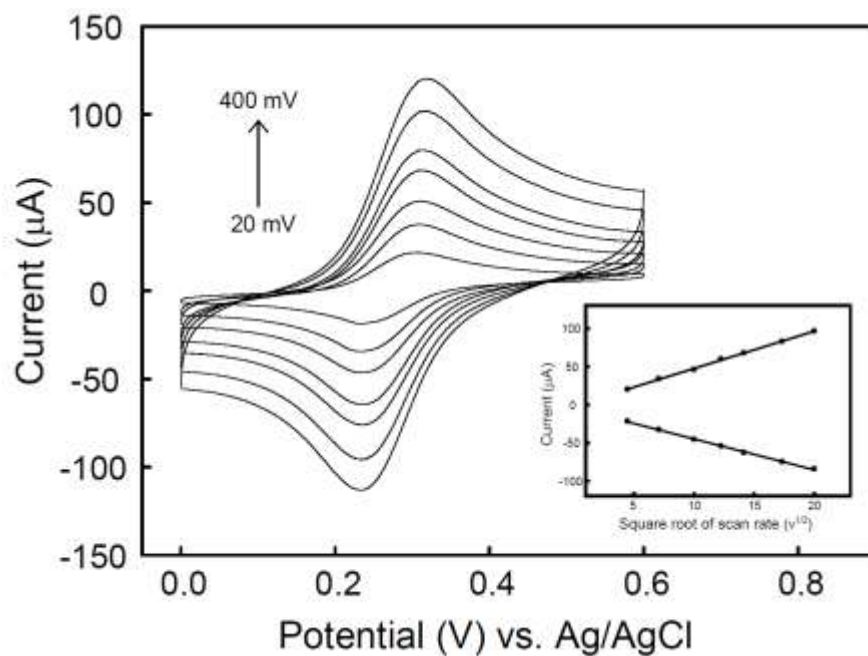

**Fig. S9** CVs of GBP-OPH/Au-CMG in 0.1 M KCl solution containing 5 mM Fe(CN)<sub>6</sub><sup>3-/4-</sup> at different scan rates (20, 50, 100, 150, 200, 300 and 400 mV s<sup>-1</sup>). The inset represents linear relationship of peak current versus square root of scan rate at GBP-OPH/Au-CMG hybrids.

**Table S1** Comparison of performance of the OPH biosensors by flow injection analysis

| Electrode                   | Pesticide           | Sensitivity<br>(nA $\mu\text{M}^{-1}$ ) | Linear range<br>( $\mu\text{M}$ ) | Limit of<br>detection (nM) | Reference |
|-----------------------------|---------------------|-----------------------------------------|-----------------------------------|----------------------------|-----------|
| GBP-OPH/Au-CMG              | Paraoxon            | 55.54                                   | 2–20                              | 95.4                       | This work |
| OPH/MWNT/GCE*               | Methyl<br>parathion | 6                                       | 2–10                              | 800                        | 2         |
|                             | Paraoxon            | 25                                      | 2–4                               | 150                        |           |
| OPH on Au<br>electrode      | Paraoxon            | 2.29                                    | 1–10                              | 100                        | 3         |
| Packed OPH/CPE <sup>†</sup> | Paraoxon            | 3.76                                    | 1–140                             | 20                         | 4         |
|                             | Methyl<br>parathion | 3.15                                    | 1–140                             | 20                         |           |

\*GCE: glassy carbon electrode, <sup>†</sup>CPE: carbon paste electrode

## Supplementary References

- 1 C. Xu, X. Wang and J. Zhu, *J. Phys. Chem. C*, 2008, **112**, 19841–19845.
- 2 R. P. Deo, J. Wang, I. Block, A. Mulchandani, K. A. Joshi, M. Trojanowicz, F. Scholz, W. Chen and Y. Lin, *Anal. Chim. Acta*, 2005, **530**, 185–189.
- 3 J. Wang, R. Krause, K. Block, M. Musameh, A. Mulchandani and M. J. Schöning, *Biosens. Bioelectron.*, 2003, **18**, 255–260.
- 4 P. Mulchandani, W. Chen and A. Mulchandani, *Environ. Sci. Technol.*, 2001, **35**, 2562–2565.
